# Supplementary material for: Singlet oxygen generation from Li+@C60nano-aggregates dispersed by laser irradiation in aqueous solution
Source: Royal Society of Chemistry journal article supplement (doi:10.1039/c5cc01885d), 2015-01-01
Supplement: c5cc01885d1.pdf [file c5cc01885d1.pdf]

## Electronic supplementary information (ESI)

### Singlet oxygen generation from $\text{Li}^+\text{@C}_{60}$ nano-aggregates dispersed by laser pulse irradiation in aqueous solution

Kei Ohkubo,<sup>\*a</sup> Naoki Kohno,<sup>a</sup> Yusuke Yamada<sup>a</sup> and Shunichi Fukuzumi<sup>\*a,b,c</sup>

<sup>a</sup> Department of Material and Life Science, Graduate School of Engineering, Osaka University, ALCA, Japan Science and Technology Agency (JST), Suita, Osaka 565-0871, Japan.

<sup>b</sup> Department of Bioinspired Science, Ewha Womans University, Seoul 120-750, Korea

<sup>c</sup> Faculty of Science and Engineering, Meijo University, ALCA and SENTAN, Japan Science and Technology Agency (JST), Nagoya, Aichi 468-0073, Japan

E-mail: [ookubo@chem.eng.osaka-u.ac.jp](mailto:ookubo@chem.eng.osaka-u.ac.jp)  
[fukuzumi@chem.eng.osaka-u.ac.jp](mailto:fukuzumi@chem.eng.osaka-u.ac.jp)

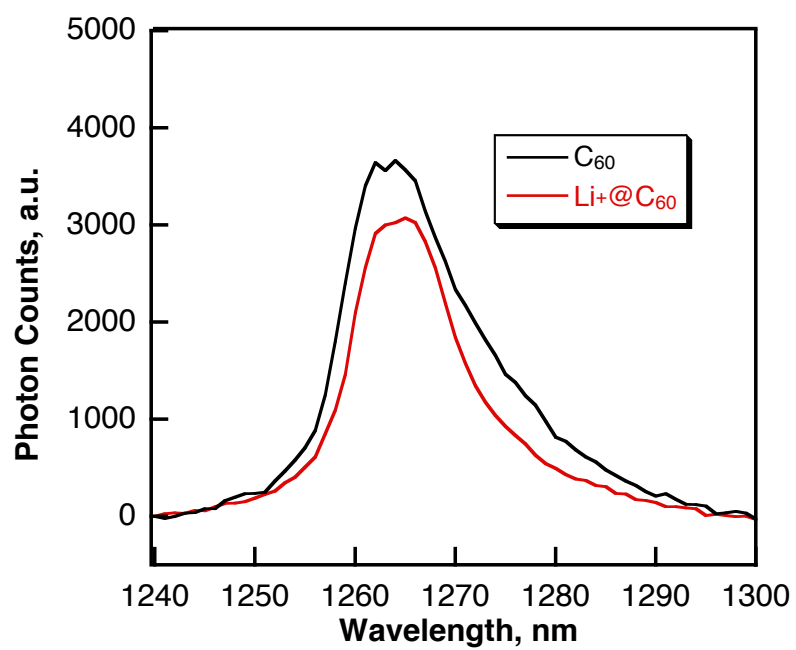

**Fig. S1** Emission spectrum of  $^1\text{O}_2$  sensitised by irradiation of  $\text{Li}^+\text{@C}_{60}$  and  $\text{C}_{60}$  at 532 nm in  $\text{O}_2$ -saturated  $\text{C}_6\text{D}_6/\text{C}_6\text{H}_5\text{CN}$  (1:1 v/v) at 298 K.

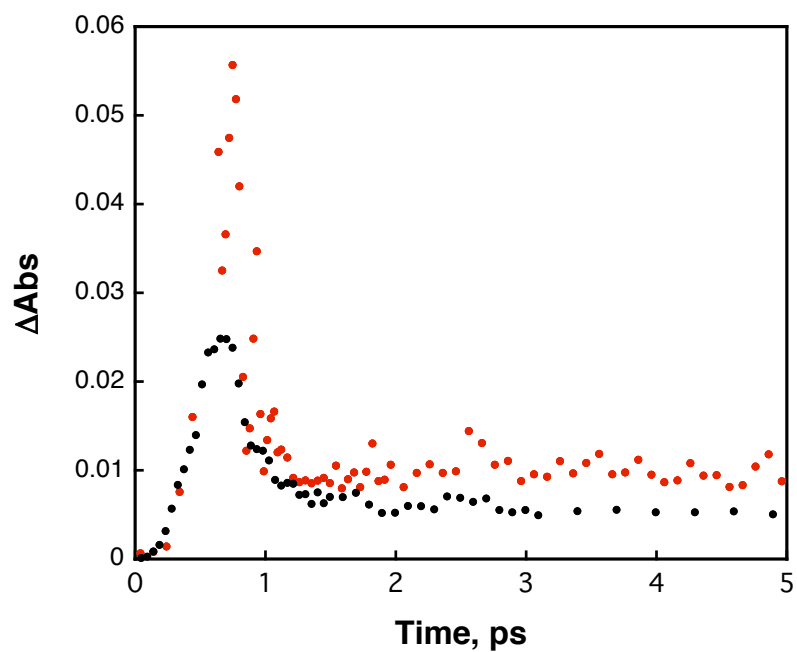

**Fig. S2** Decay time profiles at 900 nm of the transient absorption spectra of f  $(\text{Li}^+@C_{60})_n$  in deaerated distilled water obtained by femtosecond laser excitation at 393 nm with the different laser excitation power intensities ( $8 \mu\text{J pulse}^{-1}$  (black) and  $32 \mu\text{J pulse}^{-1}$  (red)).

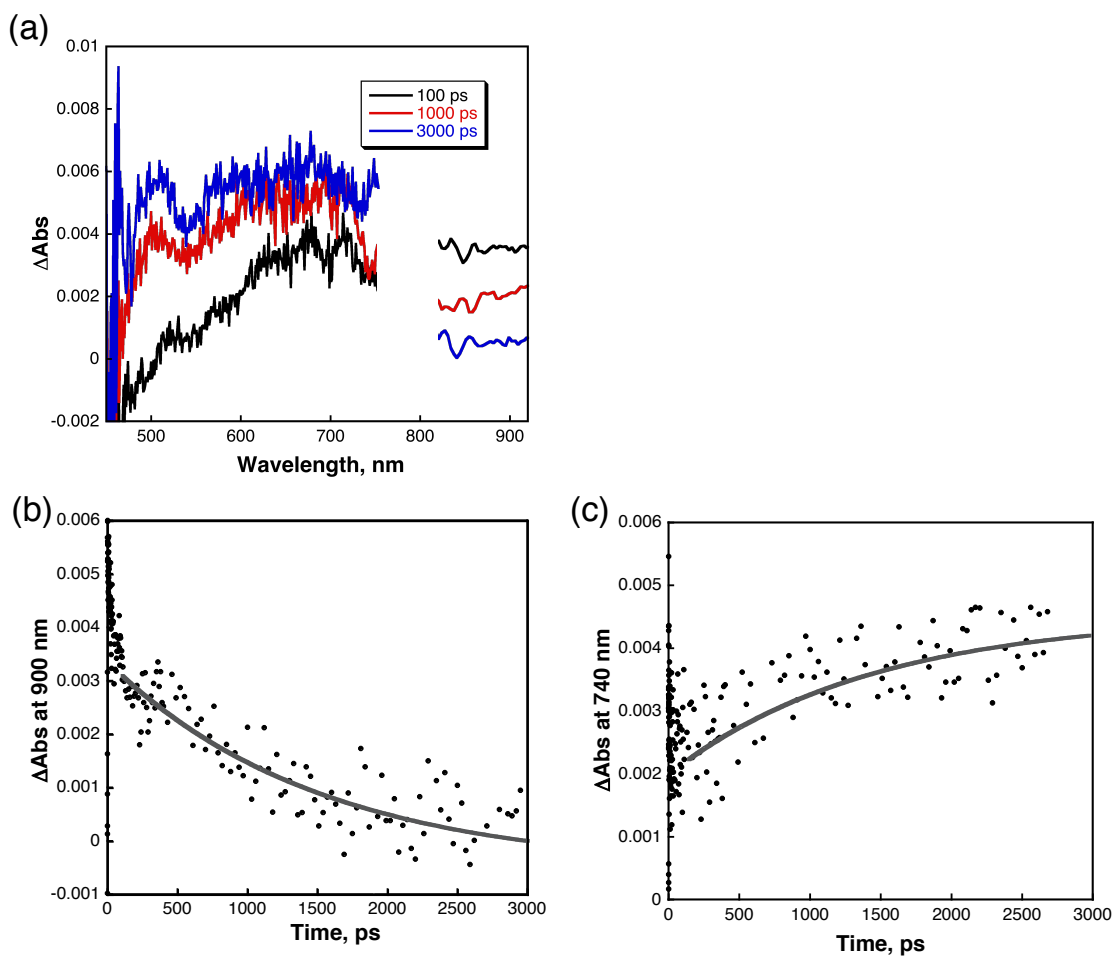

**Fig. S3** (a) Transient absorption spectra of  $(\text{Li}^+@\text{C}_{60})_n$  in deaerated distilled water obtained by femtosecond laser excitation at 393 nm; (b) Decay time profile at 900 nm. (c) Rise time profile at 740 nm.

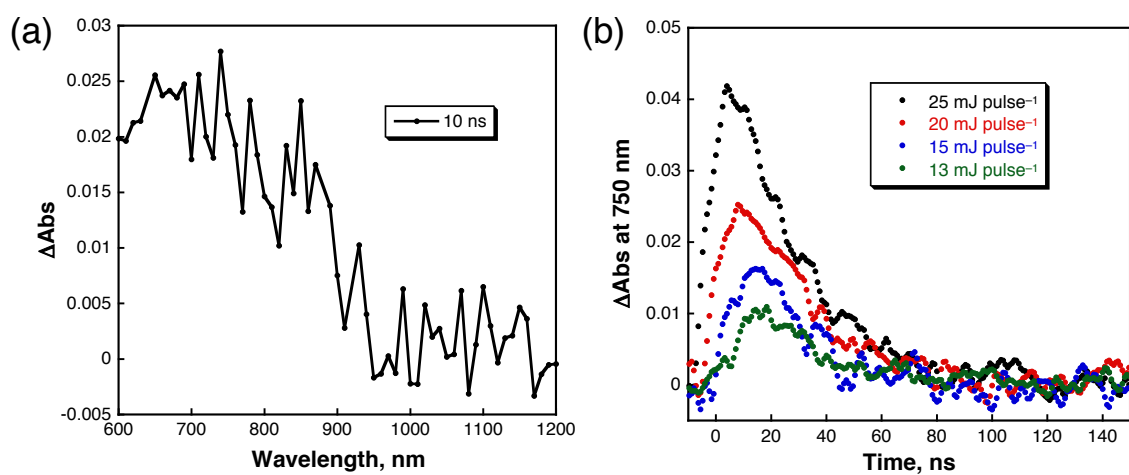

**Fig. S4** (a) Transient absorption spectra of  $(\text{Li}^+@\text{C}_{60})_n$  in deaerated  $\text{H}_2\text{O}$  taken after nanosecond laser excitation at 355 nm with the power of  $20 \text{ mJ pulse}^{-1}$ ; (b) Decay time profiles at 750 nm in the absence of  $\text{O}_2$  with a single-exponential decay curve with different laser power intensities ( $13\text{-}25 \text{ mJ pulse}^{-1}$ ).

## Experimental and instrumental details

**Materials.** Chemicals were purchased from commercial source and used without purification. Lithium ion-encapsulated fullerene hexafluorophosphate salt ( $\text{Li}^+@C_{60}\text{PF}_6^-$  from Idea International Co. Ltd.) was commercially obtained from Wako Pure Chemicals, Japan. Deuterium oxide ( $\text{D}_2\text{O}$ : 99.9%) was obtained from Cambridge Isotope Laboratories, Inc., and used as received. Purification of water ( $18.2\text{ M}\Omega\text{ cm}$ ) was performed with a Milli-Q system (Millipore, Direct-Q3 UV).

**Generation of fullerene nano-aggregates.**  $\text{H}_2\text{O}$  or  $\text{D}_2\text{O}$  solutions ( $2.5\text{ cm}^3$ ) containing fullerene ( $\text{Li}^+@C_{60}\text{PF}_6^-$ ,  $C_{60}$  and  $C_{70}$ ; 1.0 mg) in a square quartz cuvette (10 mm i.d.) sealed with a rubber septum was deaerated by bubbling with nitrogen through a stainless steel needle for 10 min. The solution was then irradiated with a Nd:YAG laser (LOTIS TII, LS2134UTF) at  $\lambda = 355\text{ nm}$  with the power of  $20\text{ mJ pulse}^{-1}$  at room temperature for 1 h with vigorous stirring. The solutions were centrifugated with 15000 rpm for 10 min to remove remained large particles. Size of the fullerene nano-aggregates was monitored by DLS measurements {Zetasizer Nano ZS instrument (Malvern Instruments Ltd., USA)}. UV-vis spectra were recorded on a Hewlett Packard 8453 diode array spectrophotometer at 298 K. Transmission electron microscope (TEM) images of  $(\text{Li}^+@C_{60})_n$  were measured using a JEOL JEM 2100 operating at 200 kV. MALDI-TOF-MS measurements were performed on a Kratos Compact MALDI I (Shimadzu) using dithranol as a matrix.

**$^1\text{O}_2$  phosphorescence measurements.** For the  $^1\text{O}_2$  phosphorescence measurements, an  $\text{O}_2$ -saturated  $\text{D}_2\text{O}$  solution containing nano-aggregates of  $(\text{Li}^+@C_{60})_n$ ,  $(C_{60})_n$  or  $(C_{70})_n$  in a quartz cell (optical path length 10 mm) was excited by an LED laser at 532 nm using an Otsuka Electronics Co. Ltd. Vis-near-IR fluorescence spectrometer.

**Laser flash photolysis.** The measurements of nanosecond transient absorption were performed according to the following procedures. Typically, a nitrogen saturated H<sub>2</sub>O solution containing (Li<sup>+</sup>@C<sub>60</sub>)<sub>n</sub> was excited by a Nd:YAG laser (Continuum, SLII-10, 4-6 ns fwhm) at  $\lambda = 355$  nm with the powers of 13-25 mJ pulse<sup>-1</sup> at 298 K. Photoinduced events were estimated by use of a continuous Xe lamp (150 W) and an InGaAs-PIN photodiode (Hamamatsu 2949) as a probe light and a detector, respectively. The output from the photodiodes and a photomultiplier tube was recorded with a digitizing oscilloscope (Tektronix, TDS3032, 300 MHz).

Femtosecond transient absorption spectroscopy experiments were conducted using an ultrafast source: Integra-C (Quantronix Corp.), an optical parametric amplifier: TOPAS (Light Conversion Ltd.) and a commercially available optical detection system: Helios provided by Ultrafast Systems LLC. The source for the pump and probe pulses were derived from the fundamental output of Integra-C ( $\lambda = 786$  nm, 2 mJ pulse<sup>-1</sup> and fwhm = 130 fs) at a repetition rate of 1 kHz. 75% of the fundamental output of the laser was introduced into a second harmonic generation (SHG) unit: Apollo (Ultrafast Systems) for excitation light generation at  $\lambda = 393$  nm, while the rest of the output was used for white light generation. The laser pulse was focused on a sapphire plate of 3 mm thickness and then white light continuum covering the visible region from  $\lambda = 410$  nm to 800 nm was generated via self-phase modulation. A variable neutral density filter, an optical aperture, and a pair of polarizer were inserted in the path in order to generate stable white light continuum. Prior to generating the probe continuum, the laser pulse was fed to a delay line that provides an experimental time window of 3.2 ns with a maximum step resolution of 7 fs. In our experiments, a wavelength at  $\lambda = 393$  nm of SHG output was irradiated at the sample cell with a spot size of 1 mm diameter where it passing through the 2 mm sample cell was focused on a fibre optic cable that was connected to a CMOS spectrograph for recording the time-resolved spectra ( $\lambda = 410 -$

800 nm). Typically, 1500 excitation pulses were averaged for 3 seconds to obtain the transient spectrum at a set delay time. Kinetic traces at appropriate wavelengths were assembled from the time-resolved spectral data. All measurements were conducted at room temperature, 295 K.

**DNA cleavage experiments.** Typically, 70  $\mu\text{L}$  of aqueous solution of  $(\text{Li}^+@\text{C}_{60})_n$  and 20  $\mu\text{L}$  of aqueous solution of DNA pBR322 ( $0.05 \mu\text{g } \mu\text{L}^{-1}$ ) were mixed in a micro test tube under dark conditions. Samples were incubated under irradiation with a white light ( $\lambda > 380 \text{ nm}$ ) from a Asahi Spectra Max-302 at 298 K. The 9  $\mu\text{L}$  of aqueous solution of DNA pBR322 ( $0.01 \mu\text{g } \mu\text{L}^{-1}$ ) was mixed with 1  $\mu\text{L}$  of loading buffer (0.1% bromophenol blue and 3.75% Ficol in TAE buffer) and loaded onto 1.0% agarose gel. The gel was run at a constant voltage of 130 V for 50 min in TAE buffer using a Nihon Eido electrophoresis kit, then washed with distilled water, soaked into 0.1% ethidium bromide aqueous solution, visualised under a UV transilluminator, and photographed using a digital camera.
